# Supplementary material
Source: PubMed Central journal article supplement (PMC3299210)
Supplement: djn379_2.pdf [file djn379_2.pdf]

Supplemental Table 1. Age-standardized lung cancer death rates and trends by race, sex, and state\*

| Region/State  | Non-Hispanic white |           |      |           |           |      | Black     |           |      |           |           |      |
|---------------|--------------------|-----------|------|-----------|-----------|------|-----------|-----------|------|-----------|-----------|------|
|               | Male               |           |      | Female    |           |      | Male      |           |      | Female    |           |      |
|               | Rate†              | APC‡      | Rank | Rate†     | APC‡      | Rank | Rate†     | APC‡      | Rank | Rate†     | APC‡      | Rank |
|               | 2001–2005          | 1996–2005 |      | 2001–2005 | 1996–2005 |      | 2001–2005 | 1996–2005 |      | 2001–2005 | 1996–2005 |      |
| Northeast     | 67.6               | -2.0§     |      | 42.5      | 0.2       |      | 74.5      | -3.8§     |      | 36.9      | -0.6      |      |
| Connecticut   | 62.9               | -1.5§     | 37   | 42.0      | 0.0       | 31   | 67.0      | -4.6§     | 39   | 33.3      | -2.0      | 34   |
| Maine         | ¶                  | ¶         |      | ¶         | ¶         |      | #         | **        |      | #         | **        |      |
| Massachusetts | 68.4               | -2.1§     | 26   | 46.4      | 0.4       | 13   | 71.6      | -1.5      | 35   | 35.0      | -0.8      | 31   |
| New Hampshire | ¶                  | ¶         |      | ¶         | ¶         |      | #         | **        |      | #         | **        |      |
| New Jersey    | 67.1               | -2.4§     | 29   | 44.0      | -0.4      | 24   | 82.2      | -3.9§     | 28   | 41.1      | -0.4      | 22   |
| New York      | 64.0               | -2.1§     | 35   | 42.5      | 0.2       | 30   | 61.4      | -4.1§     | 41   | 30.0      | -0.9§     | 38   |
| Pennsylvania  | 72.5               | -1.6§     | 23   | 40.1      | 0.6§      | 34   | 101.7     | -3.3§     | 16   | 52.3      | 0.1       | 5    |
| Rhode Island  | 74.2               | -3.2§     | 18   | 44.0      | -0.8      | 23   | 74.3      | **        | 34   | 41.0      | **        | 23   |
| Vermont       | 65.4               | -3.5§     | 32   | 39.5      | 0.0       | 35   | #         | **        |      | #         | **        |      |
| Midwest       | 76.4               | -1.2§     |      | 43.3      | 0.8§      |      | 102.8     | -2.5§     |      | 50.1      | 0.2       |      |
| Illinois      | 74.9               | -1.4§     | 17   | 43.4      | 0.6§      | 29   | 99.9      | -3.6§     | 17   | 50.0      | 0.1       | 10   |
| Indiana       | 87.5               | -1.3§     | 9    | 47.8      | 1.1§      | 8    | 107.7     | -2.1§     | 10   | 53.5      | -0.3      | 4    |
| Iowa          | 72.7               | -0.8      | 22   | 38.7      | 1.5§      | 37   | 111.0     | -1.4      | 9    | 58.4      | **        | 2    |
| Kansas        | 73.2               | -1.1      | 21   | 41.7      | 1.9§      | 32   | 103.7     | -0.7      | 14   | 45.2      | 5.0       | 14   |
| Michigan      | 72.3               | -1.3§     | 24   | 44.0      | 0.7§      | 25   | 97.1      | -2.4§     | 20   | 47.7      | -0.2      | 12   |
| Minnesota     | ¶                  | ¶         |      | ¶         | ¶         |      | 75.9      | -3.6      | 32   | 44.8      | -1.2      | 15   |
| Missouri      | 86.1               | -0.8      | 11   | 46.1      | 0.6       | 14   | 112.7     | -1.3      | 8    | 51.4      | 0.2       | 6    |
| Nebraska      | 66.2               | -1.7§     | 31   | 35.9      | 1.2       | 41   | 122.5     | 0.2       | 1    | 50.6      | **        | 7    |
| North Dakota  | ¶                  | ¶         |      | ¶         | ¶         |      | #         | **        |      | #         | **        |      |
| Ohio          | 81.0               | -1.2§     | 13   | 45.0      | 0.5       | 18   | 105.0     | -2.3§     | 13   | 50.2      | 0.2       | 9    |
| South Dakota  | 67.2               | -1.3      | 28   | 35.1      | 2.5       | 43   | #         | **        |      | #         | **        |      |
| Wisconsin     | 63.4               | -1.0§     | 36   | 38.1      | 0.9       | 39   | 119.0     | -1.7      | 3    | 56.6      | 2.4       | 3    |
| South         | 83.7               | -1.6§     |      | 46.5      | 0.6§      |      | 98.8      | -2.5§     |      | 37.4      | 0.5       |      |
| Alabama       | 94.2               | -1.1§     | 5    | 44.4      | 1.6§      | 20   | 102.5     | -0.7      | 15   | 33.1      | 2.1       | 35   |
| Arkansas      | 98.7               | -1.2§     | 3    | 49.4      | 2.1§      | 5    | 116.8     | -0.9      | 5    | 34.5      | 1.1       | 32   |
| Delaware      | 79.9               | -1.7§     | 14   | 49.6      | 0.6       | 4    | 94.1      | -2.5      | 23   | 50.3      | -1.8      | 8    |

|                      |       |       |    |      |       |    |       |       |    |      |      |    |
|----------------------|-------|-------|----|------|-------|----|-------|-------|----|------|------|----|
| District of Columbia | 50.0  | -1.9  | 45 | 27.1 | -4.8§ | 45 | 94.9  | -2.5§ | 22 | 41.6 | -1.4 | 21 |
| Florida              | 73.7  | -1.6§ | 19 | 47.8 | 0.2   | 9  | 75.3  | -4.0§ | 33 | 29.3 | -2.0 | 39 |
| Georgia              | 86.8  | -1.3§ | 10 | 43.4 | 0.5   | 28 | 93.1  | -2.9§ | 24 | 31.0 | 1.5  | 36 |
| Kentucky             | 112.0 | -0.7  | 1  | 56.0 | 1.4§  | 2  | 118.7 | -2.4§ | 4  | 58.5 | -1.5 | 1  |
| Louisiana            | 90.4  | -1.5§ | 7  | 48.6 | 1.1§  | 6  | 119.4 | -1.4§ | 2  | 42.4 | 0.1  | 20 |
| Maryland             | 72.0  | -2.4§ | 25 | 46.6 | -0.2  | 12 | 88.3  | -4.1§ | 26 | 42.8 | -0.7 | 18 |
| Mississippi          | 98.7  | -1.6§ | 4  | 45.9 | 1.2§  | 15 | 112.9 | -1.9§ | 7  | 36.8 | 1.9§ | 29 |
| North Carolina       | 84.0  | -2.1§ | 12 | 43.6 | 1.2§  | 26 | 98.2  | -3.1§ | 19 | 34.1 | 1.9§ | 33 |
| Oklahoma             | ¶     | ¶     |    | ¶    | ¶     |    | 105.8 | -0.4  | 12 | 44.8 | 0.1  | 16 |
| South Carolina       | 87.8  | -0.8§ | 8  | 43.5 | 1.0§  | 27 | 95.6  | -1.9§ | 21 | 30.3 | 1.2  | 37 |
| Tennessee            | 99.3  | -1.2§ | 2  | 47.2 | 1.9§  | 11 | 116.2 | -1.8§ | 6  | 47.2 | 2.2§ | 13 |
| Texas                | 79.2  | -2.2§ | 15 | 45.4 | -0.4  | 16 | 107.3 | -2.4§ | 11 | 44.1 | 1.1§ | 17 |
| Virginia             | 75.0  | -2.0§ | 16 | 44.3 | 0.5   | 21 | 99.6  | -2.3§ | 18 | 40.2 | 0.0  | 26 |
| West Virginia        | 94.1  | -1.8§ | 6  | 51.1 | -0.2  | 3  | 71.2  | -4.6  | 36 | 48.5 | 1.1  | 11 |
| West                 | 60.7  | -2.2§ |    | 43.1 | -0.4§ |    | 79.1  | -3.4§ |    | 41.5 | -0.8 |    |
| Alaska               | 64.9  | -1.3  | 33 | 45.3 | -1.4  | 17 | 92.3  | **    | 25 | #    | ~    |    |
| Arizona              | 60.8  | -2.0§ | 38 | 40.9 | -0.2  | 33 | 67.4  | -6.3§ | 38 | 40.4 | 0.0  | 25 |
| California           | 60.8  | -2.6§ | 39 | 44.5 | -1.0§ | 19 | 81.6  | -3.1§ | 29 | 42.7 | -0.6 | 19 |
| Colorado             | 52.1  | -2.1§ | 44 | 35.0 | 0.9   | 44 | 76.1  | -2.9  | 31 | 36.4 | -2.7 | 30 |
| Hawaii               | 57.0  | 0.0   | 42 | 39.2 | 0.6   | 36 | #     | **    |    | #    | **   |    |
| Idaho                | 57.1  | -1.7§ | 41 | 35.8 | 1.1   | 42 | #     | **    |    | #    | **   |    |
| Montana              | 64.2  | -1.8  | 34 | 44.3 | 1.7§  | 22 | #     | **    |    | #    | **   |    |
| Nevada               | 73.5  | -2.4§ | 20 | 58.2 | 0.2   | 1  | 64.4  | -5.7§ | 40 | 40.9 | -3.9 | 24 |
| New Mexico           | 56.4  | -1.5§ | 43 | 38.0 | 0.4   | 40 | 67.9  | **    | 37 | 26.4 | **   | 40 |
| Oregon               | 67.8  | -2.1§ | 27 | 48.3 | 0.3   | 7  | 86.1  | **    | 27 | 39.4 | **   | 28 |
| Utah                 | 34.1  | -0.7  | 46 | 16.7 | -0.9  | 46 | #     | **    |    | #    | **   |    |
| Washington           | 66.8  | -1.8§ | 30 | 47.6 | 0.0   | 10 | 81.2  | -4.0  | 30 | 40.1 | -0.9 | 27 |
| Wyoming              | 59.8  | -1.9§ | 40 | 38.4 | 0.7   | 38 | #     | **    |    | #    | **   |    |

\*APC = annual percent change. Source: US Mortality Files, National Center for Health Statistics.

† Rates (per 100,000 persons) are age-adjusted to the 2000 US standard population.

‡ APC is based on age-adjusted rates from 1996 through 2005.

§ APC is statistically significantly different from zero (two-sided  $P < .05$ , calculated using a  $t$  test).

|| Rank is based on the 2001–2005 rate.

¶ Death rates and trends for Non-Hispanics cannot be calculated for Maine, Minnesota, New Hampshire, North Dakota, and Oklahoma. The rates and trends for regions including these states do not include estimates from these states.

# Statistic not displayed due to fewer than 16 cancer cases.

\*\* Statistic not displayed due to fewer than 10 cancer cases for 1 year during the period..

Supplemental Table 2. Adult smoking prevalence among non-Hispanic whites by state\*

| State/Region  | Current smoking prevalence<br>Adult (≥18 y) |                     |                   |                     |                     |                   |                    |                    |                   |
|---------------|---------------------------------------------|---------------------|-------------------|---------------------|---------------------|-------------------|--------------------|--------------------|-------------------|
|               | Male                                        |                     |                   | Female              |                     |                   | APC†               |                    |                   |
|               | 1997<br>% (95% CI)                          | 2006<br>% (95% CI)  | APC†<br>1997–2006 | 1997<br>% (95% CI)  | 2006<br>% (95% CI)  | APC†<br>1997–2006 | 1997<br>% (95% CI) | 2006<br>% (95% CI) | APC†<br>1997–2006 |
| Northeast     | 24.3 (23.0 to 25.8)                         | 19.7 (18.7 to 20.8) | –2.0‡             | 21.8 (20.7 to 22.9) | 18.6 (17.8 to 19.4) | –2.0‡             |                    |                    |                   |
| Connecticut   | 20.5 (17.3 to 24.0)                         | 17.1 (15.3 to 19.2) | –4.0‡             | 20.0 (17.5 to 22.8) | 14.9 (13.6 to 16.4) | –4.0‡             |                    |                    |                   |
| Maine         | 24.9 (21.7 to 28.4)                         | 21.3 (18.7 to 24.0) | –2.0              | 20.5 (17.8 to 23.5) | 19.3 (17.4 to 21.3) | –2.0              |                    |                    |                   |
| Massachusetts | 22.2 (18.5 to 26.4)                         | 18.5 (16.5 to 20.6) | –2.0‡             | 20.1 (17.4 to 23.1) | 16.8 (15.3 to 18.4) | –2.0‡             |                    |                    |                   |
| New Hampshire | 25.5 (21.6 to 29.8)                         | 19.1 (17.1 to 21.4) | –3.0‡             | 23.8 (20.8 to 27.0) | 18.4 (16.8 to 20.1) | –3.0‡             |                    |                    |                   |
| New Jersey    | 23.4 (20.1 to 27.0)                         | 20.0 (18.1 to 22.0) | –2.0‡             | 21.0 (18.4 to 23.9) | 16.9 (15.6 to 18.3) | –2.0‡             |                    |                    |                   |
| New York      | 25.3 (22.4 to 28.4)                         | 19.8 (17.4 to 22.3) | –3.0‡             | 23.1 (20.8 to 25.6) | 19.4 (17.6 to 21.4) | –3.0‡             |                    |                    |                   |
| Pennsylvania  | 25.6 (23.0 to 28.4)                         | 21.0 (18.7 to 23.3) | –2.0‡             | 21.9 (19.8 to 24.1) | 20.3 (18.5 to 22.1) | –1.0              |                    |                    |                   |
| Rhode Island  | 25.4 (21.9 to 29.2)                         | 18.2 (15.5 to 21.2) | –3.0‡             | 23.5 (20.4 to 27.0) | 19.8 (17.5 to 22.2) | –2.0‡             |                    |                    |                   |
| Vermont       | 24.7 (22.1 to 27.5)                         | 18.8 (17.0 to 20.7) | –3.0‡             | 21.2 (18.9 to 23.6) | 16.7 (15.3 to 18.3) | –3.0‡             |                    |                    |                   |
| Midwest       | 26.7 (25.6 to 27.9)                         | 22.2 (21.1 to 23.3) | –3.0‡             | 22.2 (21.4 to 23.2) | 19.3 (18.6 to 20.1) | –2.0‡             |                    |                    |                   |
| Illinois      | 25.3 (22.4 to 28.4)                         | 21.2 (18.8 to 23.9) | –2.0‡             | 22.1 (19.8 to 24.7) | 18.1 (16.2 to 20.2) | –2.0‡             |                    |                    |                   |
| Indiana       | 29.3 (26.1 to 32.8)                         | 25.8 (23.5 to 28.3) | –2.0‡             | 23.4 (20.7 to 26.2) | 22.4 (20.6 to 24.3) | 1.0               |                    |                    |                   |
| Iowa          | 25.1 (22.8 to 27.6)                         | 22.2 (20.0 to 24.6) | –3.0‡             | 20.8 (18.8 to 22.9) | 19.9 (18.1 to 21.7) | –1.0              |                    |                    |                   |
| Kansas        | 26.8 (23.3 to 30.5)                         | 21.1 (19.2 to 23.2) | –4.0‡             | 19.0 (16.6 to 21.6) | 18.2 (16.8 to 19.6) | –1.0‡             |                    |                    |                   |
| Michigan      | 29.6 (26.5 to 33.0)                         | 22.1 (19.9 to 24.6) | –4.0‡             | 22.2 (19.9 to 24.7) | 19.6 (17.9 to 21.4) | –3.0‡             |                    |                    |                   |
| Minnesota     | 23.7 (21.7 to 25.7)                         | 18.0 (15.6 to 20.6) | –1.0              | 19.3 (17.7 to 21.1) | 17.8 (16.0 to 19.9) | 0.0               |                    |                    |                   |
| Missouri      | 29.7 (25.6 to 34.1)                         | 24.1 (20.8 to 27.6) | –3.0‡             | 25.5 (22.6 to 28.7) | 21.9 (19.6 to 24.4) | –2.0‡             |                    |                    |                   |
| Nebraska      | 23.3 (20.3 to 26.5)                         | 19.2 (17.2 to 21.4) | –2.0‡             | 20.1 (17.4 to 23.1) | 17.3 (15.7 to 18.9) | –1.0              |                    |                    |                   |
| North Dakota  | 24.1 (21.0 to 27.5)                         | 19.9 (17.5 to 22.5) | –2.0              | 19.3 (16.6 to 22.2) | 17.2 (15.3 to 19.4) | –2.0‡             |                    |                    |                   |
| Ohio          | 26.2 (22.9 to 29.8)                         | 22.9 (19.0 to 27.4) | –4.0‡             | 24.1 (21.5 to 26.9) | 19.3 (16.7 to 22.3) | –2.0              |                    |                    |                   |
| South Dakota  | 26.2 (23.0 to 29.6)                         | 18.7 (16.5 to 21.0) | –6.0‡             | 19.1 (16.7 to 21.8) | 16.8 (15.1 to 18.6) | –2.0‡             |                    |                    |                   |
| Wisconsin     | 25.0 (21.7 to 28.7)                         | 23.0 (20.3 to 25.9) | –1.0              | 20.8 (18.0 to 23.9) | 18.0 (16.2 to 20.1) | –3.0‡             |                    |                    |                   |
| South         | 27.6 (26.6 to 28.7)                         | 22.9 (22.1 to 23.8) | –2.0‡             | 23.5 (22.7 to 24.4) | 21.0 (20.3 to 21.7) | –1.0‡             |                    |                    |                   |
| Alabama       | 30.1 (26.5 to 34.0)                         | 27.4 (23.3 to 31.8) | 0.0               | 24.6 (21.6 to 27.8) | 22.5 (20.1 to 25.2) | –1.0              |                    |                    |                   |
| Arkansas      | 33.0 (28.5 to 38.0)                         | 24.9 (22.4 to 27.5) | –3.0‡             | 26.6 (23.4 to 30.1) | 22.1 (20.2 to 24.0) | –2.0‡             |                    |                    |                   |
| Delaware      | 27.7 (24.1 to 31.5)                         | 23.4 (20.2 to 26.8) | –2.0‡             | 26.1 (23.3 to 29.2) | 21.4 (18.5 to 24.6) | –3.0‡             |                    |                    |                   |

|                      |      |                |      |                |       |      |                |      |                |       |
|----------------------|------|----------------|------|----------------|-------|------|----------------|------|----------------|-------|
| District of Columbia | §    | §              | 14.1 | (11.1 to 17.8) | -5.0‡ | §    | §              | 9.2  | (6.8 to 12.3)  | -7.0‡ |
| Florida              | 26.5 | (23.6 to 29.5) | 25.3 | (22.8 to 28.1) | 0.0   | 24.5 | (22.2 to 26.9) | 21.9 | (20.2 to 23.7) | -1.0‡ |
| Georgia              | 26.2 | (22.7 to 30.0) | 22.4 | (20.1 to 25.0) | -3.0‡ | 22.1 | (18.9 to 25.7) | 19.7 | (17.9 to 21.5) | -2.0‡ |
| Kentucky             | 33.1 | (30.2 to 36.2) | 29.7 | (26.7 to 32.9) | -2.0‡ | 28.6 | (26.5 to 30.8) | 27.6 | (25.5 to 29.7) | -1.0  |
| Louisiana            | 31.9 | (27.5 to 36.7) | 24.1 | (21.6 to 26.7) | -3.0‡ | 22.4 | (19.4 to 25.8) | 23.0 | (21.3 to 24.8) | 0.0   |
| Maryland             | 21.9 | (19.4 to 24.7) | 18.4 | (16.4 to 20.6) | -3.0‡ | 20.4 | (18.1 to 22.9) | 17.6 | (16.2 to 19.2) | -2.0‡ |
| Mississippi          | 29.0 | (24.3 to 34.2) | 25.6 | (22.7 to 28.6) | 0.0   | 22.1 | (18.6 to 25.9) | 24.7 | (22.4 to 27.0) | 1.0   |
| North Carolina       | 28.7 | (25.8 to 31.8) | 25.1 | (23.2 to 27.0) | -1.0  | 23.4 | (21.2 to 25.9) | 20.2 | (18.9 to 21.5) | -2.0‡ |
| Oklahoma             | 24.9 | (21.1 to 29.1) | 26.7 | (24.3 to 29.3) | 1.0   | 23.3 | (20.3 to 26.7) | 22.8 | (21.1 to 24.6) | 0.0   |
| South Carolina       | 29.1 | (25.3 to 33.1) | 25.8 | (23.6 to 28.2) | -2.0‡ | 20.9 | (18.1 to 24.1) | 21.9 | (20.2 to 23.6) | 0.0   |
| Tennessee            | 28.4 | (25.2 to 31.8) | 23.9 | (20.8 to 27.3) | -1.0  | 28.0 | (25.6 to 30.5) | 22.3 | (20.0 to 24.7) | -1.0  |
| Texas                | 26.8 | (23.3 to 30.7) | 17.3 | (14.5 to 20.5) | -3.0‡ | 19.8 | (17.1 to 22.8) | 17.5 | (15.0 to 20.4) | -1.0  |
| Virginia             | 26.8 | (23.0 to 30.9) | 18.9 | (16.4 to 21.7) | -4.0‡ | 24.7 | (21.8 to 27.8) | 18.9 | (16.6 to 21.4) | -3.0‡ |
| West Virginia        | 26.7 | (23.7 to 29.9) | 25.8 | (23.1 to 28.6) | -1.0  | 27.8 | (25.2 to 30.5) | 26.7 | (24.4 to 29.1) | 0.0   |
| West                 | 21.8 | (20.5 to 23.3) | 17.6 | (16.4 to 18.8) | -3.0‡ | 19.3 | (18.2 to 20.4) | 16.0 | (15.1 to 16.9) | -3.0‡ |
| Alaska               | 26.1 | (20.8 to 32.2) | 19.9 | (16.1 to 24.3) | -3.0  | 23.1 | (18.5 to 28.5) | 20.3 | (16.6 to 24.5) | -3.0‡ |
| Arizona              | 21.5 | (17.6 to 25.9) | 19.9 | (15.8 to 24.9) | -3.0‡ | 22.6 | (18.8 to 26.8) | 17.4 | (14.6 to 20.6) | -2.0  |
| California           | 21.3 | (18.7 to 24.2) | 16.7 | (14.3 to 19.4) | -4.0‡ | 17.0 | (15.1 to 19.2) | 15.0 | (13.1 to 17.1) | -3.0‡ |
| Colorado             | 23.3 | (20.0 to 26.9) | 16.9 | (14.8 to 19.1) | -3.0‡ | 21.3 | (18.2 to 24.8) | 17.1 | (15.5 to 18.9) | -3.0‡ |
| Hawaii               | 19.0 | (14.9 to 23.9) | 17.1 | (14.3 to 20.4) | -3.0  | 17.5 | (13.5 to 22.3) | 14.6 | (12.5 to 17.1) | -2.0  |
| Idaho                | 21.2 | (19.0 to 23.6) | 18.5 | (16.3 to 21.0) | -3.0‡ | 17.7 | (15.8 to 19.7) | 15.3 | (13.6 to 17.0) | -3.0‡ |
| Montana              | 20.3 | (17.4 to 23.5) | 17.0 | (14.8 to 19.4) | -2.0  | 19.4 | (16.9 to 22.2) | 17.4 | (15.7 to 19.2) | -2.0‡ |
| Nevada               | 26.2 | (20.9 to 32.3) | 21.8 | (18.4 to 25.6) | -5.0‡ | 31.3 | (26.4 to 36.6) | 23.8 | (20.4 to 27.4) | -5.0‡ |
| New Mexico           | 18.0 | (14.4 to 22.2) | 20.3 | (17.7 to 23.1) | -1.0  | 24.6 | (21.1 to 28.5) | 18.3 | (16.2 to 20.5) | -3.0‡ |
| Oregon               | 21.6 | (19.0 to 24.3) | 19.8 | (17.5 to 22.4) | -1.0  | 18.6 | (16.7 to 20.8) | 17.3 | (15.6 to 19.2) | -1.0‡ |
| Utah                 | 15.5 | (13.2 to 18.1) | 9.2  | (7.6 to 11.0)  | -5.0‡ | 11.3 | (9.3 to 13.6)  | 9.2  | (7.7 to 10.9)  | -4.0‡ |
| Washington           | 24.9 | (22.1 to 27.9) | 18.3 | (17.1 to 19.6) | -4.0‡ | 22.5 | (20.3 to 24.9) | 15.7 | (14.8 to 16.6) | -4.0‡ |
| Wyoming              | 23.1 | (19.4 to 27.3) | 22.0 | (19.7 to 24.4) | -2.0‡ | 23.7 | (20.9 to 26.8) | 18.2 | (16.6 to 20.0) | -2.0‡ |
| Total US             | 25.6 | (25.0 to 26.2) | 21.1 | (20.6 to 21.6) | -2.0‡ | 22.0 | (21.6 to 22.5) | 19.1 | (18.7 to 19.5) | -2.0‡ |

\*APC=annual percent change; BRFSS=Behavioral Risk Factor Surveillance System; CI = confidence interval. Source: Adult smoking prevalence estimates are for current cigarette smoking in non-Hispanic white persons 18 years of age or older and are based on the Centers for Disease Control and Prevention's BRFSS data.

(<http://www.cdc.gov/brfss/>) State-based BRFSS data were aggregated to represent regions and the total US.

† APC is based on prevalence estimates from 1997 through 2006.

‡ APC is statistically significantly different from zero (two-sided  $P < .05$ , calculated using a  $t$  test).

§ Statistic not displayed because the estimates were based on fewer than 50 survey participants.
